# Supplementary material for: Protein profiling of water and alkali soluble cottonseed protein isolates
Source: PubMed Central journal article supplement (PMC6006339; doi:10.1038/s41598-018-27671-z), 2018-06-18
Supplement: 41598_2018_27671_MOESM1_ESM.pdf [file 41598_2018_27671_MOESM1_ESM.pdf]

## **Supplementary information**

### **Protein profiling of water and alkali soluble cottonseed protein isolates**

Zhongqi He <sup>1,\*</sup>, Dunhua Zhang <sup>2</sup>, and Heping Cao <sup>1</sup>

<sup>1</sup> USDA-ARS, Southern Regional Research Center, New Orleans, Louisiana, USA

<sup>2</sup> USDA-ARS, Aquatic Animal Health Research Unit, Auburn, Alabama, USA

\* Corresponding author

Email address: [zhongqi.he@ars.usda.gov](mailto:zhongqi.he@ars.usda.gov) (ZH)

**Supplemental Figure 1. Taxonomy, protein identification and accession number of the polypeptides identified in CSPw and CSPa**

| <b>Identified Proteins (70)</b>                                | <b>Taxonomy</b>    | <b>RepID</b>     | <b>Accession Number</b> |
|----------------------------------------------------------------|--------------------|------------------|-------------------------|
| (3R)-hydroxymyristoyl-[acyl-carrier-protein] dehydratase       | Gossypium arboreum | A0A0B0MEY6_GOSAR | A0A0B0MEY6              |
| 1-acylglycerophosphocholine O-acyltransferase 1                | Gossypium arboreum | A0A0B0N8P7_GOSAR | A0A0B0N8P7              |
| 2S albumin storage protein                                     | Gossypium hirsutum | Q39787_GOSHI     | Q39787                  |
| 40S ribosomal S3-3-like protein                                | Gossypium arboreum | A0A0B0MK71_GOSAR | A0A0B0MK71 (+1)         |
| 40S ribosomal S5                                               | Gossypium arboreum | A0A0B0PCC1_GOSAR | A0A0B0PCC1              |
| 60S ribosomal L23a                                             | Gossypium arboreum | A0A0B0MZ40_GOSAR | A0A0B0MZ40              |
| 60S ribosomal protein L14-2                                    | Gossypium arboreum | A0A0B0NJS5_GOSAR | A0A0B0NJS5              |
| Adenosylhomocysteinase                                         | Gossypium arboreum | A0A0B0NW28_GOSAR | A0A0B0NW28 (+1)         |
| ADP,ATP carrier 1, chloroplastic-like protein                  | Gossypium arboreum | A0A0B0NBX6_GOSAR | A0A0B0NBX6              |
| ALBINO3-like protein 1, chloroplastic                          | Gossypium arboreum | A0A0B0MQ65_GOSAR | A0A0B0MQ65              |
| ATP synthase subunit beta                                      | Gossypium hirsutum | C6GFP3_GOSHI     | C6GFP3                  |
| Beta-xylosidase/alpha-L-arabinofuranosidase 2                  | Gossypium arboreum | A0A0B0NEY9_GOSAR | A0A0B0NEY9              |
| Calcineurin subunit B                                          | Gossypium arboreum | A0A0B0NRG9_GOSAR | A0A0B0NRG9              |
| CBL-interacting serine/threonine-protein kinase 23             | Gossypium arboreum | A0A0B0NVJ7_GOSAR | A0A0B0NVJ7 (+1)         |
| Cellular nucleic acid-binding                                  | Gossypium arboreum | A0A0B0MSB9_GOSAR | A0A0B0MSB9              |
| Chaperone DnaJ                                                 | Gossypium arboreum | A0A0B0PLC6_GOSAR | A0A0B0PLC6              |
| Chaperonin CPN60-2, mitochondrial                              | Gossypium arboreum | A0A0B0NFA8_GOSAR | A0A0B0NFA8 (+1)         |
| Desiccation-related PCC3-06                                    | Gossypium arboreum | A0A0B0N9Z5_GOSAR | A0A0B0N9Z5              |
| DNA polymerase alpha catalytic subunit-like protein            | Gossypium arboreum | A0A0B0NEL3_GOSAR | A0A0B0NEL3              |
| Elongation factor 1-alpha                                      | Gossypium arboreum | A0A0B0P186_GOSAR | A0A0B0P186              |
| Eukaryotic initiation factor 4A-14                             | Gossypium arboreum | A0A0B0MUP2_GOSAR | A0A0B0MUP2              |
| Exocyst complex component 7                                    | Gossypium arboreum | A0A0B0PW69_GOSAR | A0A0B0PW69              |
| Flagellar attachment zone 1                                    | Gossypium arboreum | A0A0B0NTH5_GOSAR | A0A0B0NTH5              |
| Fructose-bisphosphate aldolase, cytoplasmic isozyme            | Gossypium arboreum | A0A0B0N935_GOSAR | A0A0B0N935              |
| Glucose-6-phosphate isomerase, cytosolic                       | Gossypium arboreum | A0A0B0MUW2_GOSAR | A0A0B0MUW2 (+1)         |
| Glyceraldehyde-3-phosphate dehydrogenase-2C cytosolic          | Gossypium arboreum | A0A0B0MV73_GOSAR | A0A0B0MV73              |
| Golgi to ER traffic 4                                          | Gossypium arboreum | A0A0B0NB99_GOSAR | A0A0B0NB99              |
| Guanylate-binding 5                                            | Gossypium arboreum | A0A0B0PS63_GOSAR | A0A0B0PS63              |
| HEAT repeat-containing 7A                                      | Gossypium arboreum | A0A0B0Q1K1_GOSAR | A0A0B0Q1K1              |
| Heat shock protein 70                                          | Gossypium hirsutum | D2D320_GOSHI     | D2D320                  |
| Histone H2B                                                    | Gossypium arboreum | A0A0B0NGQ0_GOSAR | A0A0B0NGQ0 (+1)         |
| Histone-lysine N-methyltransferase ATX2-like protein           | Gossypium arboreum | A0A0B0NJ00_GOSAR | A0A0B0NJ00              |
| Isocitrate dehydrogenase [NADP]                                | Gossypium arboreum | A0A0B0MIG9_GOSAR | A0A0B0MIG9 (+1)         |
| Kinase PVPK-1                                                  | Gossypium arboreum | A0A0B0NGF3_GOSAR | A0A0B0NGF3              |
| Late embryogenesis abundant protein                            | Gossypium arboreum | A0A0B0P335_GOSAR | A0A0B0P335 (+1)         |
| Late embryogenesis abundant protein D-19                       | Gossypium hirsutum | LE19_GOSHI       | P09443                  |
| Legumin A                                                      | Gossypium hirsutum | LEGA_GOSHI       | P09802                  |
| Legumin B                                                      | Gossypium hirsutum | LEGB_GOSHI       | P09800                  |
| Lipid A export ATP-binding/permease MsbA                       | Gossypium arboreum | A0A0B0NQZ1_GOSAR | A0A0B0NQZ1              |
| Low molecular weight heat shock protein                        | Gossypium hirsutum | A8WCV3_GOSHI     | A8WCV3                  |
| Malate dehydrogenase-2C cytoplasmic                            | Gossypium arboreum | A0A0B0NLV9_GOSAR | A0A0B0NLV9              |
| Mitochondrial 2-oxoglutarate/malate carrier                    | Gossypium arboreum | A0A0B0PR02_GOSAR | A0A0B0PR02              |
| Oleosin 16.4 kDa                                               | Gossypium hirsutum | OLEO7_GOSHI      | P29528                  |
| Origin recognition complex subunit 1                           | Gossypium arboreum | A0A0B0MH05_GOSAR | A0A0B0MH05              |
| Peptidyl-prolyl cis-trans isomerase cyp8                       | Gossypium arboreum | A0A0B0POB2_GOSAR | A0A0B0POB2              |
| Phosphoglycerate kinase, cytosolic                             | Gossypium          | A0A0B0NN51_GOSAR | A0A0B0NN51              |
| Phototropin-1-like protein                                     | Gossypium arboreum | A0A0B0MNY7_GOSAR | A0A0B0MNY7              |
| Proteasome subunit beta type-6-like protein                    | Gossypium arboreum | A0A0B0PP74_GOSAR | A0A0B0PP74              |
| Protein argonaute 4-like protein                               | Gossypium arboreum | A0A0B0NX11_GOSAR | A0A0B0NX11              |
| Protein lin-54                                                 | Gossypium arboreum | A0A0B0P3S6_GOSAR | A0A0B0P3S6              |
| Protein neuralized                                             | Gossypium arboreum | A0A0B0PWY7_GOSAR | A0A0B0PWY7              |
| Protein NLP8-like protein                                      | Gossypium arboreum | A0A0B0MLL9_GOSAR | A0A0B0MLL9              |
| Protein yeeZ                                                   | Gossypium arboreum | A0A0B0MFB1_GOSAR | A0A0B0MFB1              |
| Putative ATP-dependent RNA helicase DHX36                      | Gossypium arboreum | A0A0B0PXH7_GOSAR | A0A0B0PXH7              |
| Putative vacuolar sorting-associated protein 13B               | Gossypium arboreum | A0A0B0NXF5_GOSAR | A0A0B0NXF5              |
| Putative zinc finger CONSTANS-LIKE 11-like protein             | Gossypium arboreum | A0A0B0Q151_GOSAR | A0A0B0Q151              |
| Replication A 70 kDa DNA-binding subunit                       | Gossypium arboreum | A0A0B0MSM1_GOSAR | A0A0B0MSM1              |
| Rhamnolacturonate lyase                                        | Gossypium arboreum | A0A0B0M5N8_GOSAR | A0A0B0M5N8              |
| RING finger and CHY zinc finger domain-containing 1            | Gossypium arboreum | A0A0B0NK68_GOSAR | A0A0B0NK68              |
| Serine/threonine-protein kinase SIK3                           | Gossypium arboreum | A0A0B0NNV2_GOSAR | A0A0B0NNV2              |
| Transcription factor BIM2-like protein                         | Gossypium arboreum | A0A0B0PND5_GOSAR | A0A0B0PND5              |
| Transcription initiation factor TFIID subunit 1-B-like protein | Gossypium arboreum | A0A0B0NUG8_GOSAR | A0A0B0NUG8              |
| Vacuolar-sorting receptor 1-like protein                       | Gossypium arboreum | A0A0B0PFQ0_GOSAR | A0A0B0PFQ0              |
| Vicilin C72                                                    | Gossypium hirsutum | VCLB_GOSHI       | P09801                  |
| Vicilin C72                                                    | Gossypium arboreum | A0A0B0N1K7_GOSAR | A0A0B0N1K7              |
| Vicilin GC72-A                                                 | Gossypium hirsutum | VCLA_GOSHI       | P09799                  |
| Vicilin-like antimicrobial peptides 2-1                        | Gossypium arboreum | A0A0B0PET1_GOSAR | A0A0B0PET1              |
| Vicilin-like antimicrobial peptides 2-2                        | Gossypium arboreum | A0A0B0PUP3_GOSAR | A0A0B0PUP3              |
| V-type proton ATPase subunit B 1                               | Gossypium arboreum | A0A0B0PNB1_GOSAR | A0A0B0PNB1 (+1)         |
| Zfy1                                                           | Gossypium arboreum | A0A0B0NWH3_GOSAR | A0A0B0NWH3              |





**Supplemental Figure 3.** The whole amino acid sequence of Vicilin GC72-A and its peptide fragments (colored) identified in Ca5 and Cw5 gel bands

**Ca5 gel band**

|                    |                     |                    |                    |                      |
|--------------------|---------------------|--------------------|--------------------|----------------------|
| MVRNKSA CVV        | LLFSLFLSFG          | LLCSAKDFPG         | RRGDDDDPPKR        | YEDCRRR <b>RC EW</b> |
| <b>DTRGQKEQQQ</b>  | <b>CEESCKSQYG</b>   | <b>EKDQQQRHRP</b>  | <b>EDPQRRYE EC</b> | <b>QQE CRQQEER</b>   |
| QRPQCQQRCL         | KRFEQEQQQS          | QRQFQECQQH         | CHQQEQRP ER        | KQQCVRECRE           |
| RYQENPWRE          | REEEAEEET           | EEGEQE QSHN        | PFHFHRRSFQ         | SR <b>FREEHGNF</b>   |
| <b>RVLQRFASRH</b>  | PILRGINEFR          | LSILEANPNT         | <b>FVLPHH CDAE</b> | <b>KIYLV TNGRG</b>   |
| <b>TLTFLTHENK</b>  | <b>ESYNVVPGVV</b>   | <b>VRVPAGSTVY</b>  | <b>LANQDNKEKL</b>  | <b>IIAVLHRPVN</b>    |
| NPRQFEFFFP         | AGSQR PQSYL         | RAFSREILEP         | AFNTR <b>SEQLD</b> | <b>ELFGGRQSHR</b>    |
| RQQGQGMFR <b>K</b> | <b>ASQEQIRALS</b>   | <b>QEATSPREKS</b>  | GERFAFNLLY         | RTPRYSNQNG           |
| RFYEACPREF         | RQLSDINVTV          | SALQLNQGSI         | FVPHYNSKAT         | FVVLVNEGNG           |
| YVEMVSPHLP         | R <b>QSSFE EEEE</b> | <b>QQQE QEQEEE</b> | <b>RRSGQYRKIR</b>  | SQLSR <b>GDIFV</b>   |
| <b>VPANFPVTFV</b>  | <b>ASQNQNLRMT</b>   | <b>GFGLYNQIN</b>   | <b>PDHNQRIFVA</b>  | GKINHVRQWD           |
| SQAKELAFGV         | SSR <b>LVDEIFN</b>  | <b>NNPQESYFVS</b>  | RQRQRA SE          |                      |

**Cw5 gel band**

|                    |                     |                    |                     |                    |
|--------------------|---------------------|--------------------|---------------------|--------------------|
| MVRNKSA CVV        | LLFSLFLSFG          | LLCSAKDFPG         | RRGDDDDPPKR         | YEDCRRRRC EW       |
| DTRGQKEQQQ         | CEESCKSQYG          | EKDQQQRHRP         | EDPQRR <b>YE EC</b> | <b>QQE CRQQEER</b> |
| QRPQCQQRCL         | K <b>RFEQEQQQS</b>  | <b>QR</b> QFQECQQH | CHQQEQRP ER         | KQQCVRECRE         |
| RYQENPWRE          | REEEAEEET           | EEGEQE QSHN        | PFHFHRRSFQ          | SR <b>FREEHGNF</b> |
| <b>RVLQRFASRH</b>  | PILRGINEFR          | LSILEANPNT         | FVLPHH CDAE         | <b>KIYLV TNGRG</b> |
| <b>TLTFLTHENK</b>  | <b>ESYNVVPGVV</b>   | <b>VRVPAGSTVY</b>  | <b>LANQDNKEKL</b>   | <b>IIAVLHRPVN</b>  |
| NPRQFEFFFP         | AGSQR PQSYL         | RAFSREILEP         | <b>AFNTRSEQLD</b>   | <b>ELFGGRQSHR</b>  |
| <b>RQQGQGMFRK</b>  | <b>ASQEQIRALS</b>   | <b>QEATSPREKS</b>  | GERFAFNLLY          | RTPRYSNQNG         |
| RFYEACPREF         | RQLSDINVTV          | SALQLNQGSI         | FVPHYNSKAT          | FVVLVNEGNG         |
| YVEMVSPHLP         | R <b>QSSFE EEEE</b> | <b>QQQE QEQEEE</b> | <b>RRSGQYRKIR</b>   | SQLSR <b>GDIFV</b> |
| <b>VPANFPVTFV</b>  | <b>ASQNQNLRMT</b>   | <b>GFGLYNQIN</b>   | <b>PDHNQRIFVA</b>   | GKINHVRQWD         |
| SQAK <b>ELAFGV</b> | <b>SSR</b> LVDEIFN  | <b>NNPQESYFVS</b>  | RQRQRA SE           |                    |
